# Supplementary material for: Reduced muscle strength (dynapenia) in women with obesity confers a greater risk of falls and fractures in the UK Biobank
Source: PubMed Central journal article supplement (PMC10108064; doi:10.1002/oby.23609), 2022-12-11
Supplement: OBY-31-496-s001.pdf [file OBY-31-496-s001.pdf]

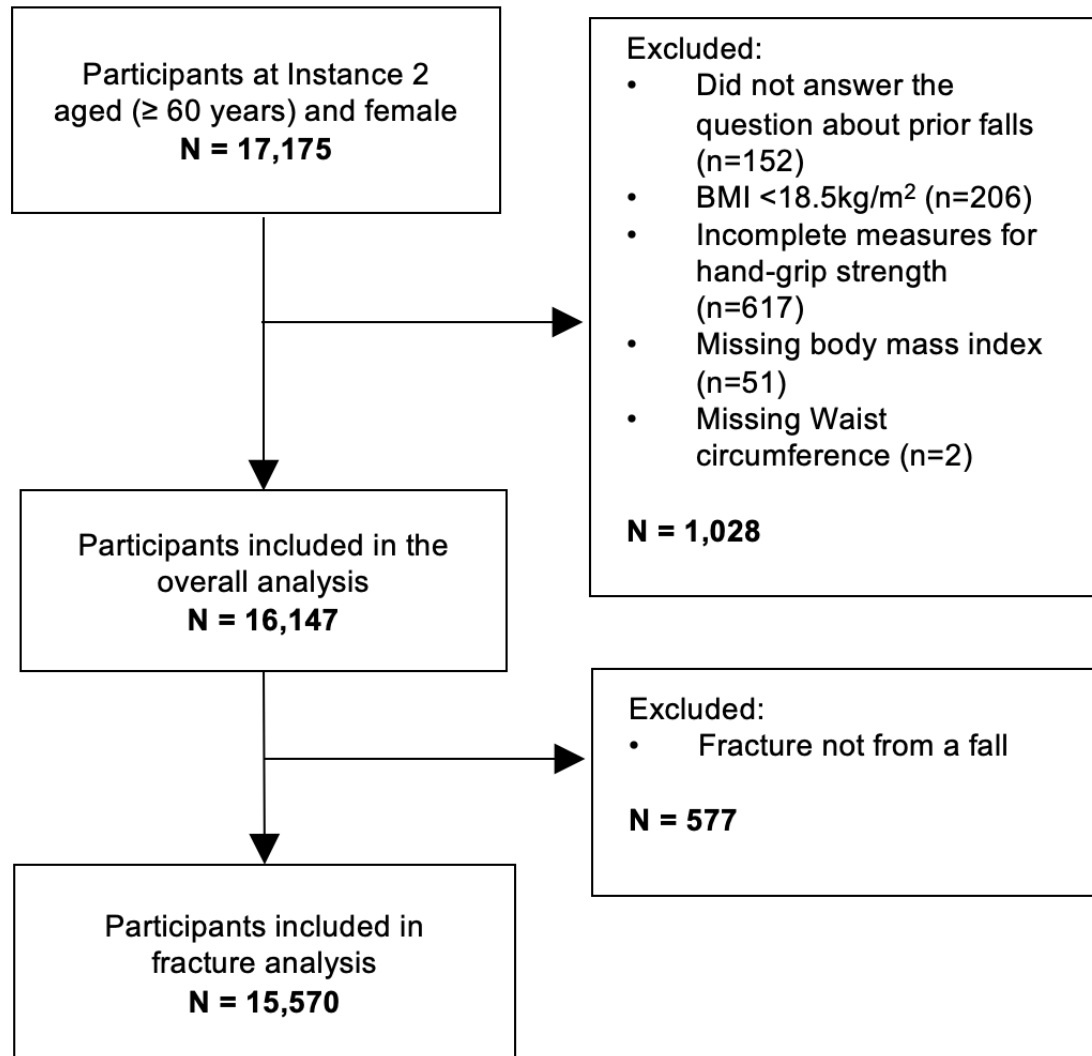

**Supplementary Figure 1:** Flow diagram of number of individuals at each stage examined for eligibility.
