# Supplementary material for: Reduced muscle strength (dynapenia) in women with obesity confers a greater risk of falls and fractures in the UK Biobank
Source: PubMed Central journal article supplement (PMC10108064; doi:10.1002/oby.23609), 2022-12-11
Supplement: OBY-31-496-s005.pdf [file OBY-31-496-s005.pdf]

### Dynapenia by BMI categories - Lower Extremity Fractures

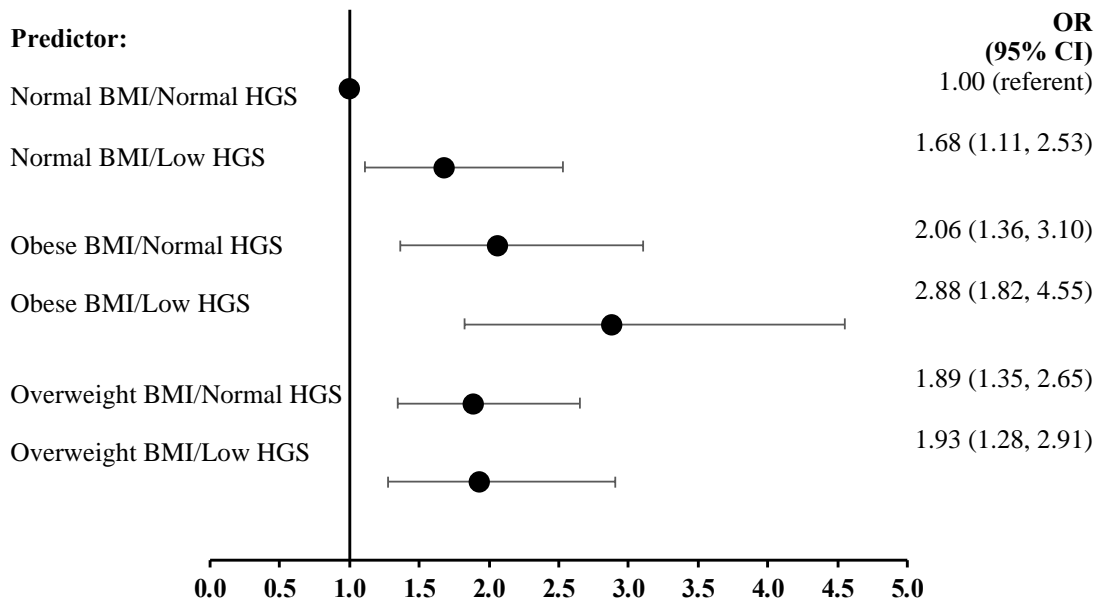

(a) Lower extremity fractures (ankle, leg)

### Dynapenia by BMI categories - All Other Fractures

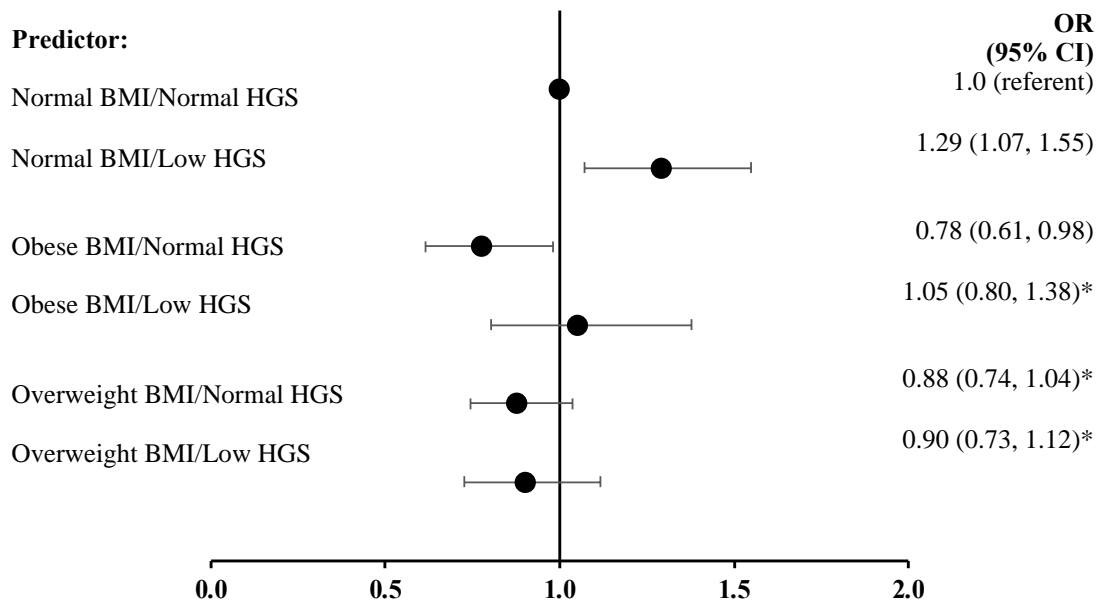

(b) All other fractures (hip, spine, wrist, arm, other bones)

**Supplementary Figure 2** Association between (a) lower extremity or (b) all other fractures by dynapenia and obesity status excluding those with BMI  $\geq 40\text{kg/m}^2$  (n = 188)

Adjusted for age, measurement centre, smoking status, self-reported 'diabetes' status, alcohol status. \* p > 0.05. Abbreviations: BMI = Body Mass Index; HGS = Hand Grip Strength.
